# Supplementary material for: Mechanistic role of nucleobases in self-cleavage catalysis of hairpin ribozyme at ambient versus high-pressure conditions
Source: Royal Society of Chemistry journal article supplement (doi:10.1039/c8cp03142h), 2018-01-01
Supplement: c8cp03142h1.pdf [file c8cp03142h1.pdf]

## Electronic Supplementary Information (ESI):

# Mechanistic role of nucleobases in self-cleavage catalysis of hairpin ribozyme at ambient versus high-pressure conditions

Narendra Kumar and Dominik Marx

Lehrstuhl für Theoretische Chemie, Ruhr-Universität Bochum, 44780 Bochum, Germany

## Supporting analyses and figures

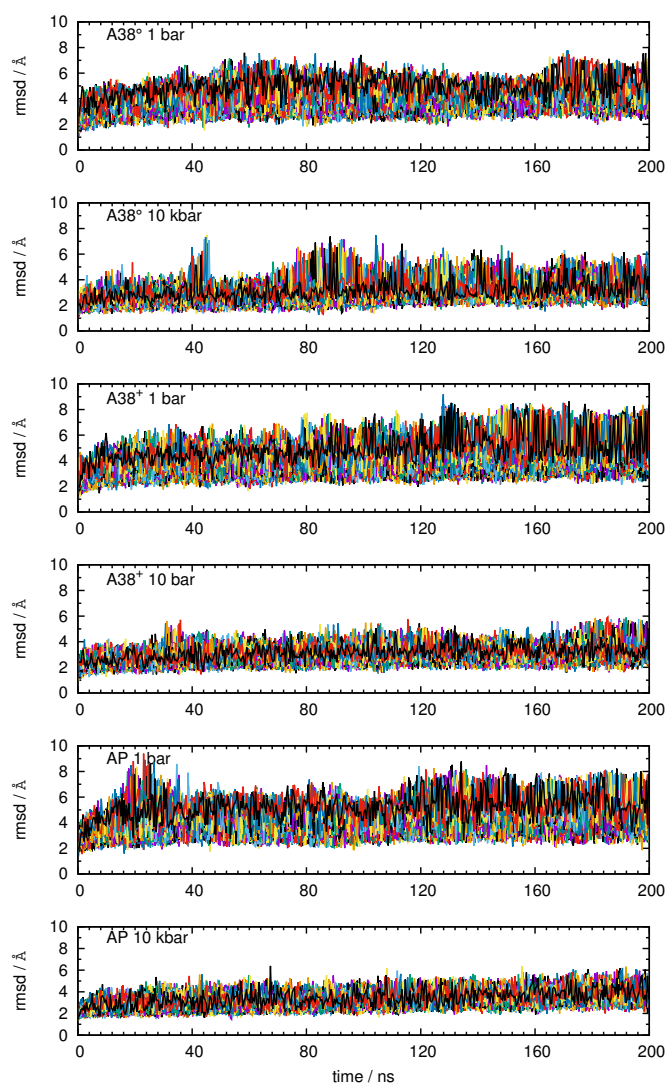

**Fig. 1** Root-mean-square deviation (RMSD) of all heavy atoms of the A38<sup>°</sup>, A38<sup>+</sup> and AP states of hairpin ribozyme at 1 bar and 10 kbar and 300 K with respect to its crystal structure (PDB ID: 2OUE based on Ref. 1); a different color is used for each of the 64 replica in the underlying T-REMD simulations which sampled temperatures up to 404 K. There is no abrupt change or significant increase in the RMSD observed which suggests that the ribozyme remains within the docked state in all six system as required for our analyses.

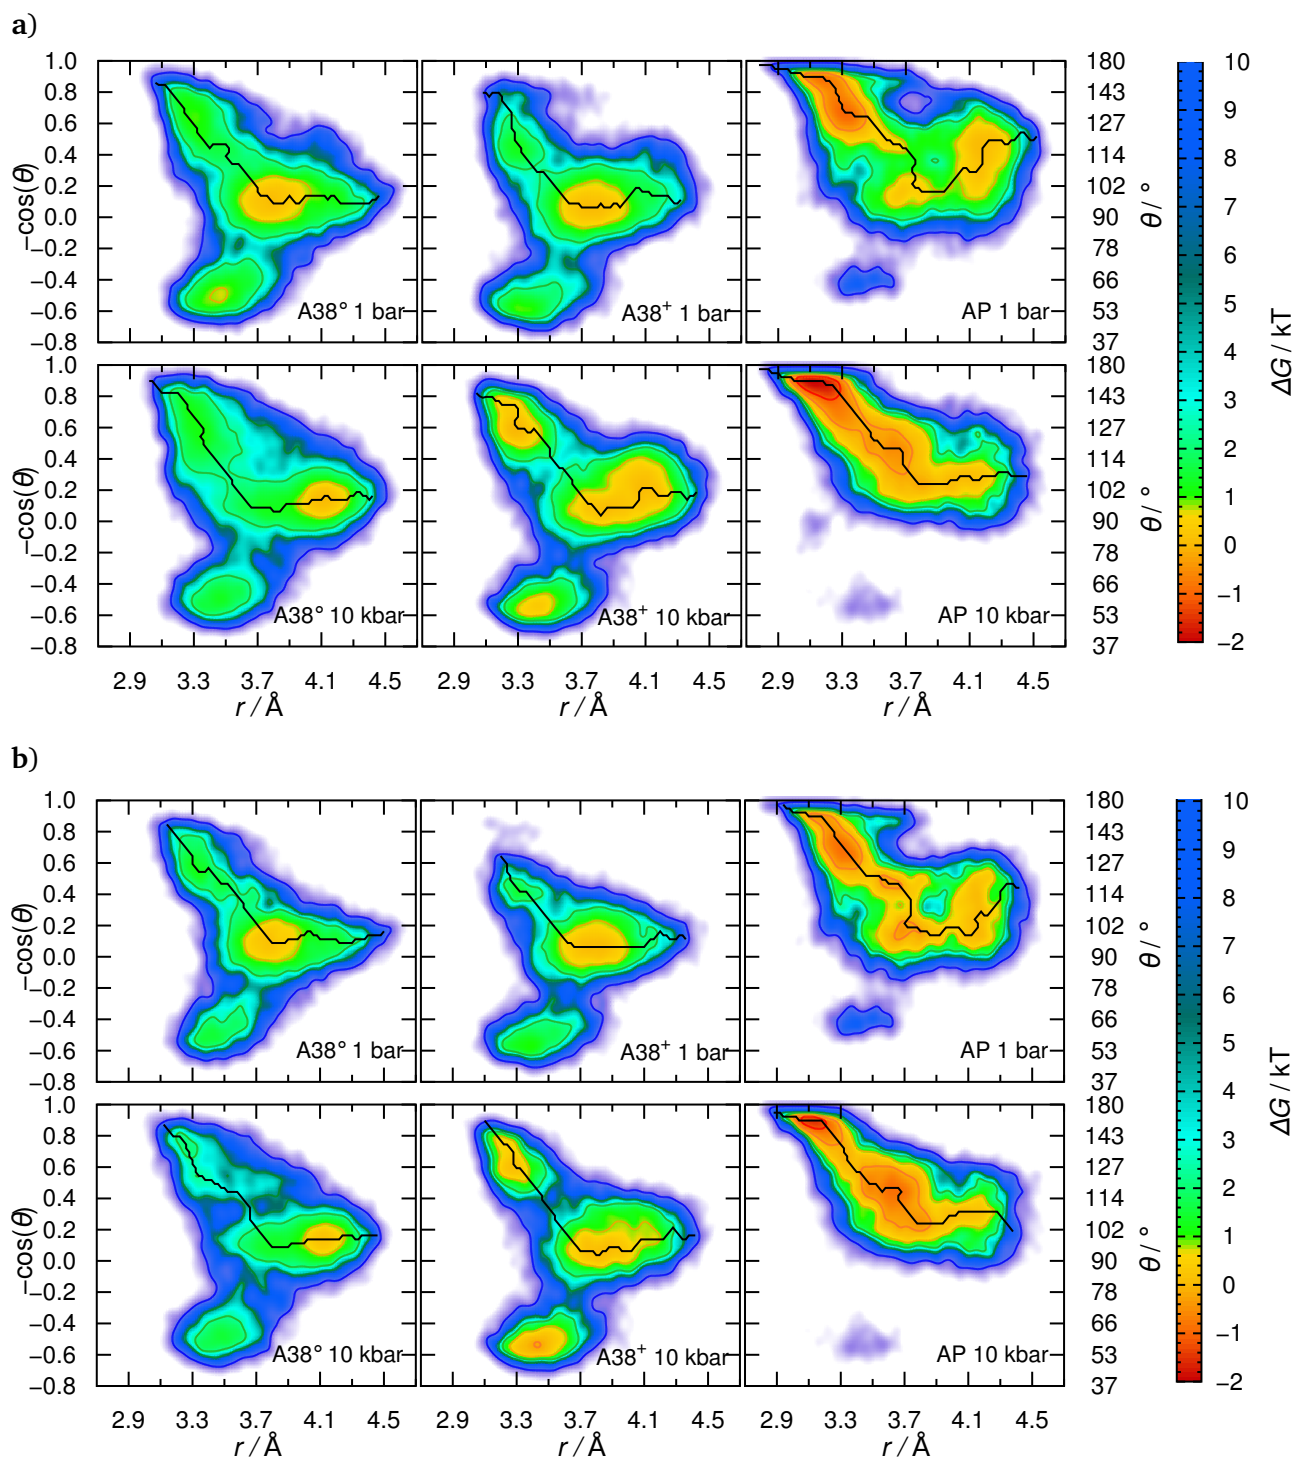

**Fig. 2** Gibbs free energy landscapes of the A38<sup>°</sup>, A38<sup>+</sup>, and AP states of the hairpin ribozyme both at 1 bar and 10 kbar by considering (a) full simulation time, and (b) the second half of the simulation time (see Fig. 5 of the main text for more information). The free energy landscapes of (a) both at 1 bar and 10 kbar are qualitatively similar to their corresponding counterparts in (b) thus confirming the convergence.

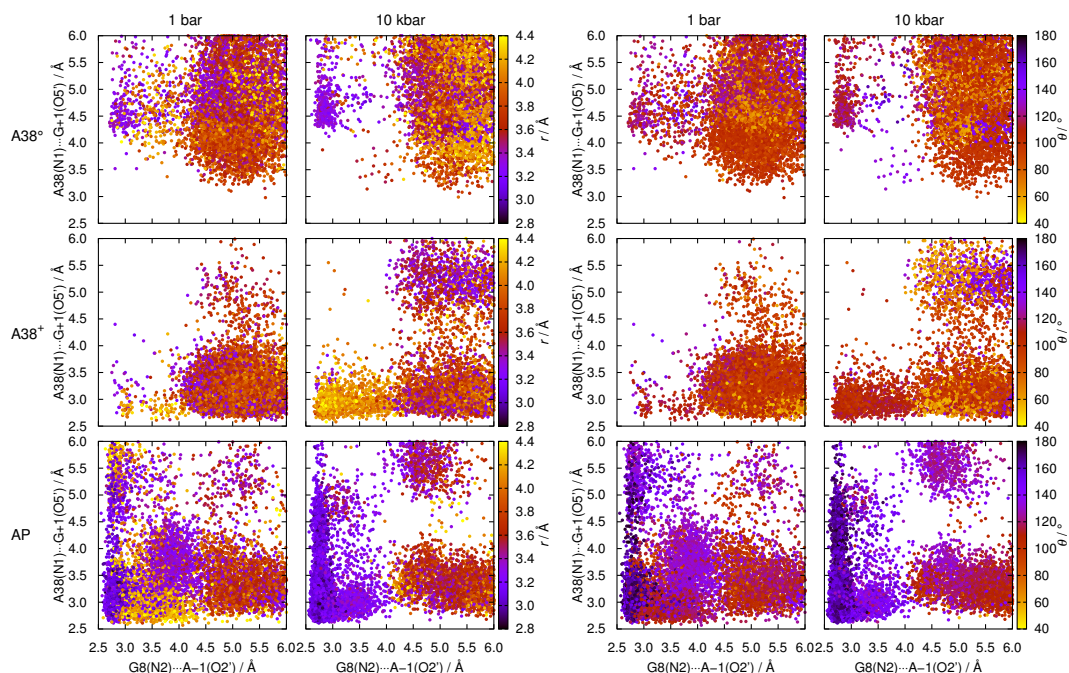

**Fig. 3** Three-dimensional structural correlations between the  $G8(N2) \cdots A-1(O2')$  and  $A38(N1) \cdots G+1(O5')$  distances (where small values indicate hydrogen bonding w.r.t.  $O2'$  and  $O5'$ , respectively) and the  $O2' - P$  distance  $r$  (left part of the figure) as well as the attack angle  $\theta$  (right part of the figure) at 1 bar and 10 kbar (according to the topmost line) at 300 K, see Fig. 3b and Fig. 4 of the main text for site labels and structures. The  $r$  and  $\theta$  values at a given point in the  $(x,y)$ -plane spanned by  $G8(N2) \cdots A-1(O2')$  and  $A38(N1) \cdots G+1(O5')$  are provided in terms of the color bars as defined at the respective right axes, thus dark (violet/blue) colors encode the preferred inline attack arrangement realized when  $r$  is small and  $\theta$  is close to  $180^\circ$ . The panels from top to bottom correspond to the  $A38^\circ$ ,  $A38^+$  and AP states, respectively, as indicated. The same correlation analysis involving  $G8(N1) \cdots A-1(O2')$  is shown in Fig. 8 of the main text.

## References

- 1 J. Salter, J. Krucinska, S. Alam, V. Grum-Tokars and J. E. Wedekind, *Biochemistry*, 2006, **45**, 686–700.

## Preparation files for protonated A38 nucleobase and the cleavage site of AP

```
% % % % % % % % % % % % % % % % % % % % % % % % % % % % % % % % % % % % % % % % % % % % % % % %
[ bondedtypes ]
;
; RAP is Adenine protonated at N1 with charges from JPCB 2010, 114, 6642-6652.
;
; RAA is Adenine deprotonated at 2-O', O2' is changed to O2a
; GAA is Guanidine phosphate protonated at proR oxygen., O2P is changed O2n
;
;
[ RAP ]
[ atoms ]
  P      P          1.16620     1
  O1P    O2         -0.77600     2
  O2P    O2         -0.77600     3
  O5'    OS         -0.49890     4
  C5'    CI          0.05580     5
  H5' 1  H1          0.06790     6
  H5' 2  H1          0.06790     7
  C4'    CT          0.10650     8
  H4'    H1          0.11740     9
  O4'    OS         -0.35480    10
  C1'    CT          0.12970    11
  H1'    H2          0.20070    12
  N9     N*         -0.05320    13
  C8     C5          0.14120    14
  H8     H5          0.20080    15
  N7     NB         -0.53300    16
  C5     CB          0.26130    17
  C6     CA          0.27480    18
  N6     N2         -0.72510    19
  H61    H           0.42820    20
  H62    H           0.42820    21
  N1     NA         -0.26040    22
  HN1    H           0.35660    23
  C2     CQ          0.19640    24
  H2     H5          0.18890    25
  N3     NC         -0.44310    26
  C4     CB          0.32400    27
  C3'    CT          0.20220    28
  H3'    H1          0.06150    29
  C2'    CT          0.06700    30
  H2' 1  H1          0.09720    31
  O2'    OH         -0.61390    32
  HO' 2  HO          0.41860    33
  O3'    OS         -0.52460    34
```

[ bonds ]

P O1P  
P O2P  
P O5'  
O5' C5'  
C5' H5'1  
C5' H5'2  
C5' C4'  
C4' H4'  
C4' O4'  
C4' C3'  
O4' C1'  
C1' H1'  
C1' N9  
C1' C2'  
N9 C8  
N9 C4  
C8 H8  
C8 N7  
N7 C5  
C5 C6  
C5 C4  
C6 N6  
C6 N1  
N6 H61  
N6 H62  
N1 C2  
HN1 N1  
C2 H2  
C2 N3  
N3 C4  
C3' H3'  
C3' C2'  
C3' O3'  
C2' H2'1  
C2' O2'  
O2' HO'2  
-O3' P

[ impropers ]

C4 C8 N9 C1'  
C6 H61 N6 H62  
N9 N7 C8 H8  
N1 N3 C2 H2  
C5 N6 C6 N1  
C6 C2 N1 HN1

[ RAA ]

[ atoms ]

|       |    |          |    |
|-------|----|----------|----|
| P     | P  | 1.16620  | 1  |
| O1P   | O2 | -0.77600 | 2  |
| O2P   | O2 | -0.77600 | 3  |
| O5'   | OS | -0.49890 | 4  |
| C5'   | CI | 0.05580  | 5  |
| H5' 1 | H1 | 0.06790  | 6  |
| H5' 2 | H1 | 0.06790  | 7  |
| C4'   | CT | 0.10650  | 8  |
| H4'   | H1 | 0.11740  | 9  |
| O4'   | OS | -0.35480 | 10 |
| C1'   | CT | 0.03940  | 11 |
| H1'   | H2 | 0.20070  | 12 |
| N9    | N* | -0.02510 | 13 |
| C8    | C5 | 0.20060  | 14 |
| H8    | H5 | 0.15530  | 15 |
| N7    | NB | -0.60730 | 16 |
| C5    | CB | 0.05150  | 17 |
| C6    | CA | 0.70090  | 18 |
| N6    | N2 | -0.90190 | 19 |
| H61   | H  | 0.41150  | 20 |
| H62   | H  | 0.41150  | 21 |
| N1    | NC | -0.76150 | 22 |
| C2    | CQ | 0.58750  | 23 |
| H2    | H5 | 0.04730  | 24 |
| N3    | NC | -0.69970 | 25 |
| C4    | CB | 0.30530  | 26 |
| C3'   | CT | 0.20220  | 27 |
| H3'   | H1 | 0.06150  | 28 |
| C2'   | CT | 0.06700  | 29 |
| H2' 1 | H1 | 0.09720  | 30 |
| O2a   | O2 | -0.77600 | 31 |
| O3'   | OS | -0.52460 | 32 |

[ bonds ]

|     |       |
|-----|-------|
| P   | O1P   |
| P   | O2P   |
| P   | O5'   |
| O5' | C5'   |
| C5' | H5' 1 |
| C5' | H5' 2 |
| C5' | C4'   |
| C4' | H4'   |
| C4' | O4'   |
| C4' | C3'   |
| O4' | C1'   |
| C1' | H1'   |
| C1' | N9    |
| C1' | C2'   |
| N9  | C8    |

N9 C4  
 C8 H8  
 C8 N7  
 N7 C5  
 C5 C6  
 C5 C4  
 C6 N6  
 C6 N1  
 N6 H61  
 N6 H62  
 N1 C2  
 C2 H2  
 C2 N3  
 N3 C4  
 C3' H3'  
 C3' C2'  
 C3' O3'  
 C2' H2' 1  
 C2' O2a  
 -O3' P

[ impropers ]

|    |     |    |     |
|----|-----|----|-----|
| C4 | C8  | N9 | C1' |
| C6 | H61 | N6 | H62 |
| N9 | N7  | C8 | H8  |
| N1 | N3  | C2 | H2  |
| C5 | N6  | C6 | N1  |

[ GAA ]

[ atoms ]

|       |    |          |    |
|-------|----|----------|----|
| P     | P  | 1.16620  | 1  |
| O1P   | O2 | -0.77600 | 2  |
| O2n   | OH | -0.61390 | 3  |
| HOP   | HX | 0.41860  | 4  |
| O5'   | OS | -0.49890 | 5  |
| C5'   | CI | 0.05580  | 6  |
| H5' 1 | H1 | 0.06790  | 7  |
| H5' 2 | H1 | 0.06790  | 8  |
| C4'   | CT | 0.10650  | 9  |
| H4'   | H1 | 0.11740  | 10 |
| O4'   | OS | -0.35480 | 11 |
| C1'   | CT | 0.01910  | 12 |
| H1'   | H2 | 0.20060  | 13 |
| N9    | N* | 0.04920  | 14 |
| C8    | CP | 0.13740  | 15 |
| H8    | H5 | 0.16400  | 16 |
| N7    | NB | -0.57090 | 17 |
| C5    | CB | 0.17440  | 18 |
| C6    | C  | 0.47700  | 19 |

|       |    |          |    |
|-------|----|----------|----|
| O6    | O  | -0.55970 | 20 |
| N1    | NA | -0.47870 | 21 |
| H1    | H  | 0.34240  | 22 |
| C2    | CA | 0.76570  | 23 |
| N2    | N2 | -0.96720 | 24 |
| H21   | H  | 0.43640  | 25 |
| H22   | H  | 0.43640  | 26 |
| N3    | NC | -0.63230 | 27 |
| C4    | CB | 0.12220  | 28 |
| C3'   | CT | 0.20220  | 29 |
| H3'   | H1 | 0.06150  | 30 |
| C2'   | CT | 0.06700  | 31 |
| H2' 1 | H1 | 0.09720  | 32 |
| O2'   | OH | -0.61390 | 33 |
| HO' 2 | HO | 0.41860  | 34 |
| O3'   | OS | -0.52460 | 35 |

[ bonds ]

|     |       |
|-----|-------|
| P   | O1P   |
| P   | O2n   |
| HOP | O2n   |
| P   | O5'   |
| O5' | C5'   |
| C5' | H5' 1 |
| C5' | H5' 2 |
| C5' | C4'   |
| C4' | H4'   |
| C4' | O4'   |
| C4' | C3'   |
| O4' | C1'   |
| C1' | H1'   |
| C1' | N9    |
| C1' | C2'   |
| N9  | C8    |
| N9  | C4    |
| C8  | H8    |
| C8  | N7    |
| N7  | C5    |
| C5  | C6    |
| C5  | C4    |
| C6  | O6    |
| C6  | N1    |
| N1  | H1    |
| N1  | C2    |
| C2  | N2    |
| C2  | N3    |
| N2  | H21   |
| N2  | H22   |
| N3  | C4    |



C3' H3'  
C3' C2'  
C3' O3'  
C2' H2'1  
C2' O2'  
O2' HO'2  
-O3' P

[ impropers ]

|    |     |    |     |
|----|-----|----|-----|
| C4 | C8  | N9 | C1' |
| C5 | N1  | C6 | O6  |
| C6 | C2  | N1 | H1  |
| C2 | H21 | N2 | H22 |
| N9 | N7  | C8 | H8  |
| N2 | N1  | C2 | N3  |

% % % % % % % % % % % % % % % % % % % % % % % % % % % % % % % % % % % % % % % % % % % % %
